# Supplementary material for: Chemically and physically enhanced adhesion for robust interfaces in all-soft vertical organic photodetectors
Source: Royal Society of Chemistry journal article supplement (doi:10.1039/d4cc03214d), 2024-01-01
Supplement: d4cc03214d1.pdf [file d4cc03214d1.pdf]

## Supplementary information

### Chemically and physically enhanced adhesion for robust interfaces in all-soft vertical organic photodetectors

Haechan Park,<sup>‡a</sup> Daeun Kim,<sup>‡a</sup> Sehyun Kim,<sup>a</sup> Myeonghyeon Na,<sup>a</sup> Yeeun Kim,<sup>a</sup> Kyoseung Sim<sup>\*a,b</sup>

<sup>a</sup> Department of Chemistry, Ulsan National Institute of Science and Technology (UNIST), Ulsan  
44919, Republic of Korea

<sup>b</sup> X-Dynamic Research Center, Ulsan National Institute of Science and Technology (UNIST),  
Ulsan 44919, Republic of Korea

\*Corresponding author. E-mail: [kyos@unist.ac.kr](mailto:kyos@unist.ac.kr)

## Experimental Section

### Materials

PDMS (Sylgard 184, silicone elastomer) was purchased from Dow-Corning. Dimethyl sulfoxide (DMSO; >99.9%), Tergitol 15-s-9, polyurethane diol solution (PUD; average  $M_n \sim 320$ , 88 wt% in  $H_2O$ ), dichloromethane (DCM; >99.5%), chloroform (CF; >99.5%), polyethylenimine 80% ethoxylated solution (PEIE;  $M_w = 110,000$ , 37 wt% in  $H_2O$ ), (3-glycidyloxypropyl)trimethoxysilane (GPTMS), poly(3-hexylthiophene-2,5-diyl) (P3HT;  $M_w = 50,000 - 100,000$ ), [6,6]-Phenyl- $C_{71}$ -butyric acid methyl ester ( $PC_{71}BM$ ) were purchased from Sigma-Aldrich. (3-aminopropyl)triethoxysilane (APTES) was purchased from Thermo Fisher Scientific. Polyimide (PI) film was purchased from Alphaflon. Poly(3,4-ethylenedioxythiophene):poly(styrene sulfonate) (PEDOT:PSS, Heraeus Clevis PH1000) was purchased from Ossila. Isopropyl alcohol (IPA) was purchased from Sanchun Chemical. All materials were used as received without further purification process.

### Preparation of PUD/PEDOT:PSS and PEIE solutions

For the preparation of the PUD/PEDOT:PSS solution, PEDOT:PSS was mixed with 1 wt% Tergitol 15-s-9, 5 wt% DMSO, and the desired content (wt%) of PUD. The mixture was gently stirred at 400 rpm for 30 mins and subsequently stored in a refrigerator at 4°C until needed. The PEIE solution was prepared by dissolving PEIE in IPA at a concentration of 1 wt%. This solution was stirred at 400 rpm for 10 mins and then refrigerated at 4°C before use.

### Preparation of P3HT-NFs: $PC_{71}BM$ /PDMS solution

Firstly, liquid PDMS was prepared with a 10:1 weight ratio of base and curing agent. Then, the PDMS precursor was dissolved in DCM with a concentration of 160 mg/ml to prepare PDMS solution. P3HT and  $PC_{71}BM$  were dissolved in DCM at a concentration of 4 mg/ml and heated at 90 °C for 30 mins. Thereafter, P3HT solution was kept in the refrigerator at 4 °C for 12 h resulting in the formation of the P3HT nanofibrils (P3HT-NFs), as reported.<sup>1-3</sup> The P3HT-NFs and  $PC_{71}BM$  solutions were mixed in a 1:1 volume ratio, followed by blending with PDMS solution at a 10:1

volume ratio. The final mixture maintained a total weight ratio of the P3HT-NFs and PC<sub>71</sub>BM to PDMS at 1:4.

### **Fabrication of all-soft v-OPD**

The fabrication of the all-soft v-OPD began with the preparation of liquid PDMS mixed at a 15:1 weight ratio of base to curing agent. The liquid PDMS was spin-casted onto a glass substrate at 400 rpm for 30 s and then solidified at 100°C in a convection oven for 30 mins. The prepared PDMS substrates were treated by UV-O<sub>3</sub> for 20 mins. Subsequently, two separate UV-O<sub>3</sub> treated PDMS substrates were immersed in solutions of GPTMS and APTES (2 wt% in DI water) for 30 mins each, to prepare anode and cathode substrates, respectively, followed by drying with N<sub>2</sub> gas. PI-based shadow masks with the desired patterns, prepared using a programmable cutting machine (Silhouette Portrait 3, Silhouette America Inc.), were laminated onto the GPTMS-PDMS and APTES-PDMS, respectively, to define the electrode areas. For the anode, a PUD/PEDOT:PSS solution was spin-casted at 1500 rpm for 30 s onto the GPTMS-PDMS with a shadow mask, followed by a 5 min heating at 80°C after shadow mask removal, completing the anode substrate preparation. The cathode was formed by spin-casting a PEIE solution at 4000 rpm for 30 s immediately after the formation of the PUD/PEDOT:PSS layer, followed by annealing for 10 min at 80°C after shadow mask removal. Next, the desired volume of the P3HT-NFs:PC<sub>71</sub>BM/PDMS solution was drop-casted onto the cathode and thermally annealed at 120°C for 20 min to form the soft light-sensing layer (approximately 1.5 μm-thick), completing the cathode substrate preparation. Finally, the anode and cathode substrates were aligned and vertically assembled using a customized aligner, and the resultant device was heated at 80°C for 10 mins to ensure robust chemical interfacial adhesion of the device.

### **Characterization of materials and devices**

The electrical properties of the PUD/PEDOT:PSS electrodes and the P3HT-NFs:PC<sub>71</sub>BM/PDMS light-sensing layer were characterized by a semiconductor analyser (4200-SCS, Keithley Instruments Inc.) and LCR meter (E4980A, Keysight Technologies Inc.). For the characterization under the mechanical strains, programmable stretching machine

(Bending&stretchable machine system, SNM Korea) was additionally utilized. A spectrophotometer (V-670, JASCO Inc.) was employed to characterize the transmission and absorption properties of the electrodes and light-sensing layers in the visible light region. The mechanical properties of the substrates, electrodes, and light-sensing layers were characterized using a motorized force tester (ESM 750, Mark-10 Corp.) equipped with force gauges (M5-2 or M7-50, Mark-10 Corp.), which were selectively used depending on the force levels. The device characteristics of the all-soft v-OPDs were measured with precision source/measure unit (B2912B, Keysight Technologies Inc.) and white light emitting diode (MCWHL5, Thorlab Inc). The customized stretcher was additionally used for characterize device performance under mechanical strains.

## References

- 1 J. Y. Oh, M. Shin, T. I. Lee, W. S. Jang, Y. Min, J.-M. Myoung, H. K. Baik and U. Jeong, *Macromolecules*, 2012, **45**, 7504-7513.
- 2 H. Park, S. Kim, J. Lee, I. Lee, S. Bontapalle, Y. Na and K. Sim, *Nat. Electron.*, 2024, **7**, 39-50.
- 3 K. Sim, Z. Rao, H. J. Kim, A. Thukral, H. Shim and C. Yu, *Sci. Adv.*, 2019, **5**, eaav5749.

## Supplementary Figures.

### I. Anode substrate preparation

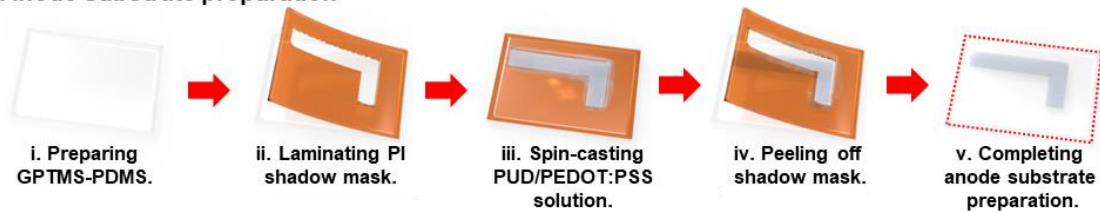

### II. Cathode substrate preparation

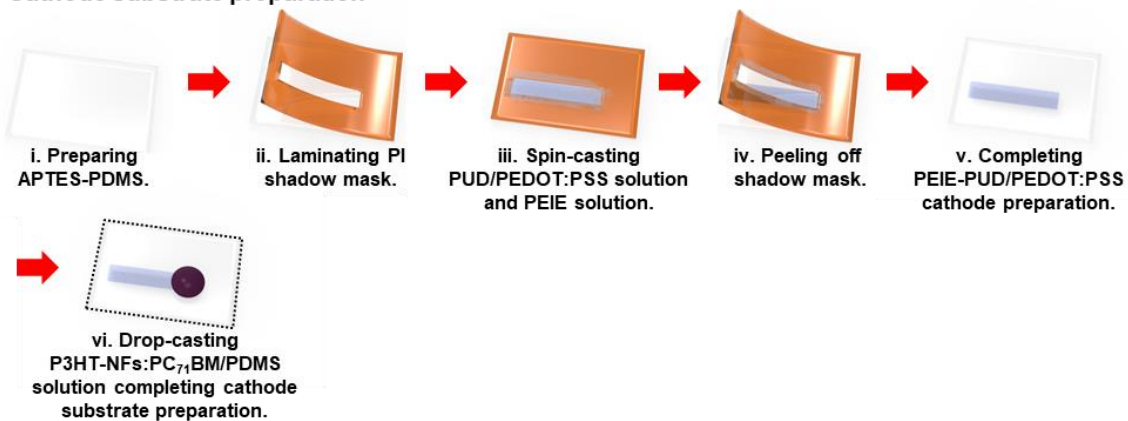

### III. Assembly

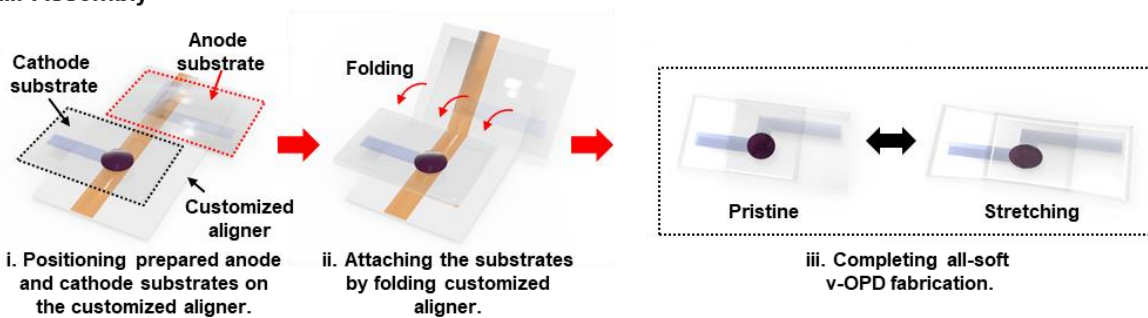

Fig. S1 A schematic fabrication process of the all-soft v-OPDs.

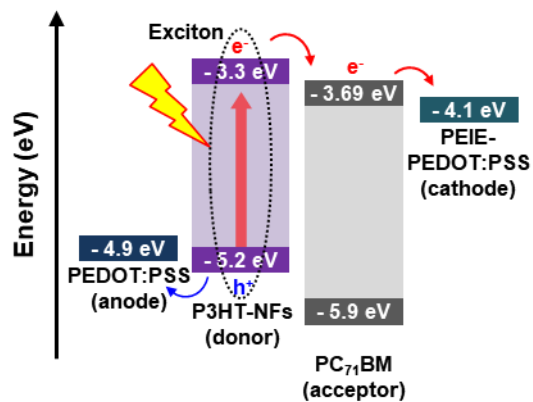

**Fig. S2 The energy diagram of the all-soft v-OPDs.** When visible light illuminates the all-soft v-OPDs, photons are primarily absorbed by P3HT-NFs (electron donor), generating excitons. These excitons diffuse and dissociate at the interfaces of P3HT-NFs and PC<sub>71</sub>BM (electron acceptor), resulting in free charge carriers. Finally, holes and electrons transport through the P3HT-NFs and PC<sub>71</sub>BM phases, respectively, and are collected by the anode and cathode.

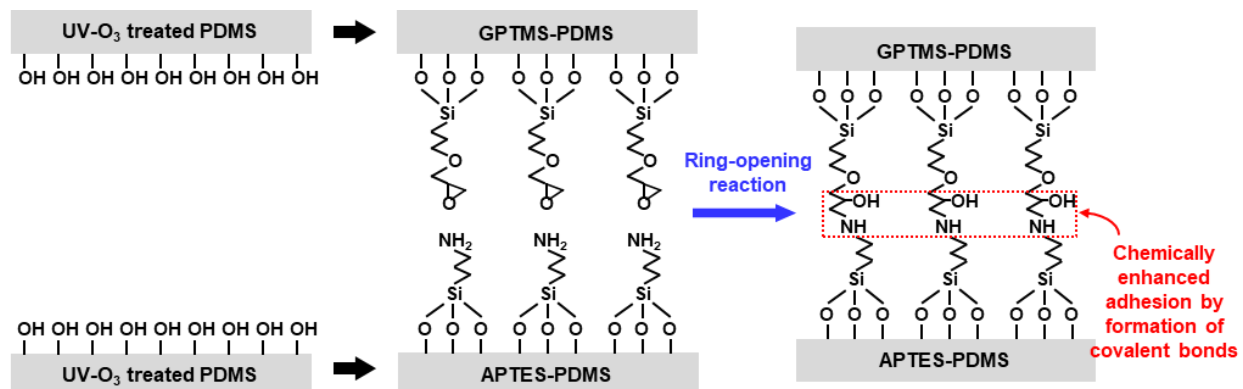

**Fig. S3** A schematic mechanism of the chemically enhanced adhesion between GPTMS-PDMS and APTES-PDMS.



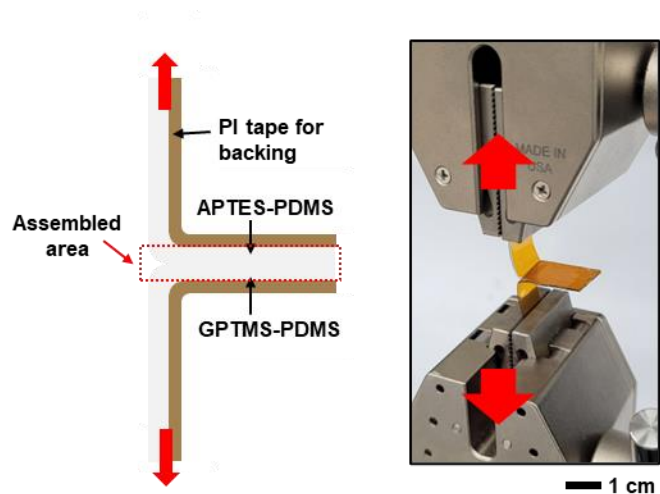

**Fig. S4** A schematic (left) and an optical image (right) of the t-peeling for the assembled PDMS.

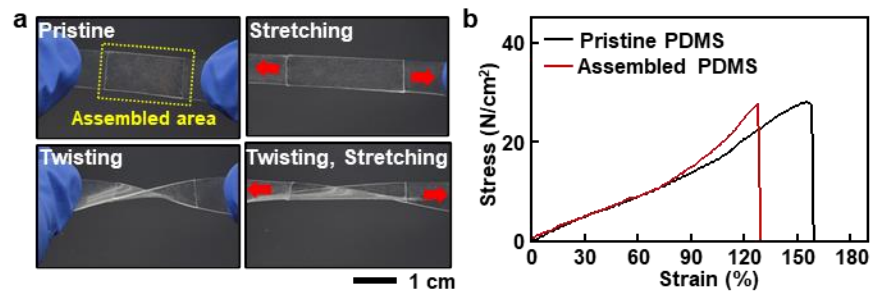

**Fig. S5 Mechanical characteristics of the assembled PDMS. (a)** Optical images of the assembled PDMS under various deformations. **(b)** The stress-strain curves of the pristine and assembled PDMS.

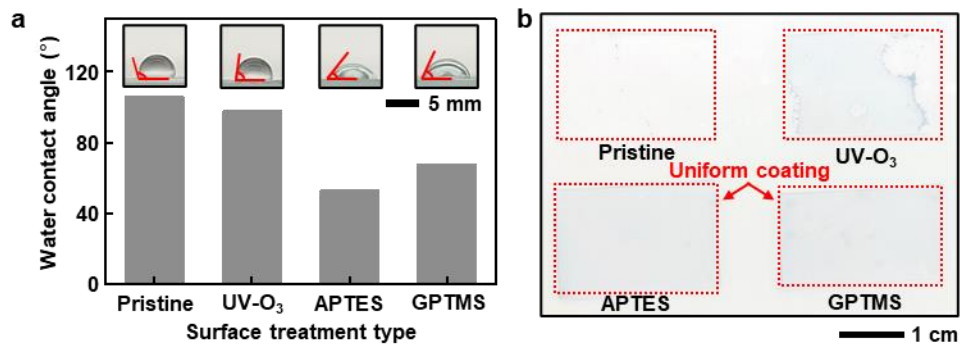

**Fig. S6 Uniform coating of the PUD/PEDOT:PSS electrodes on the silane-treated PDMS. (a)** Comparison of water contact angles on the PDMS surface treated with various methods. Inset is the corresponding images. **(b)** Comparison of coating uniformity of the electrodes on the PDMS surface-treated with various methods. Note that 15 wt% of PUD was incorporated into the PUD/PEDOT:PSS electrodes.

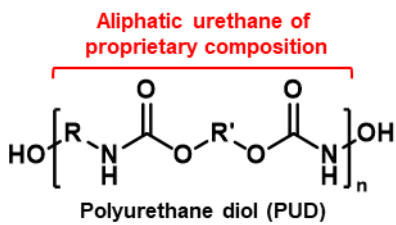

**Fig. S7** The molecular structure of the PUD.

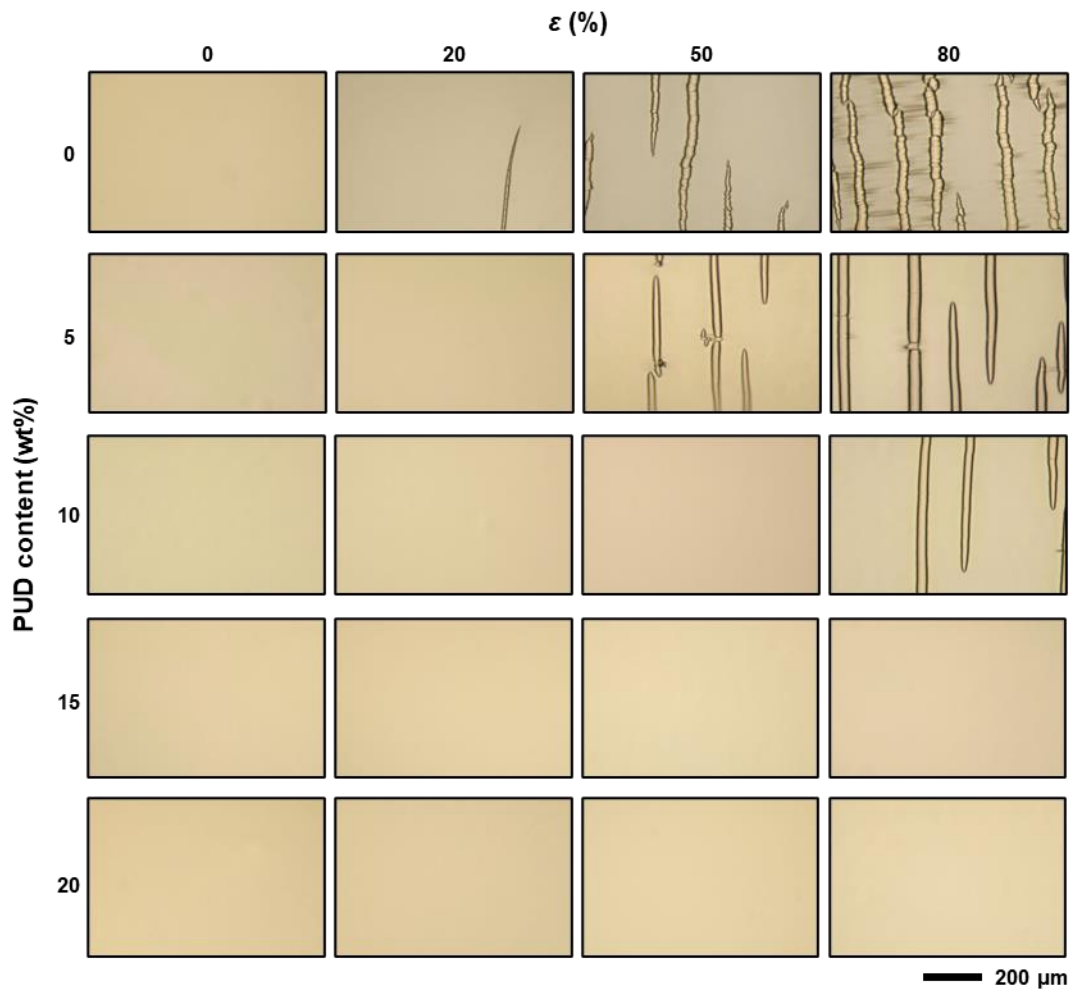

**Fig. S8** Optical microscopic images of the PUD/PEDOT:PSS electrodes with different PUD content under the mechanical strains ( $\epsilon$ ).

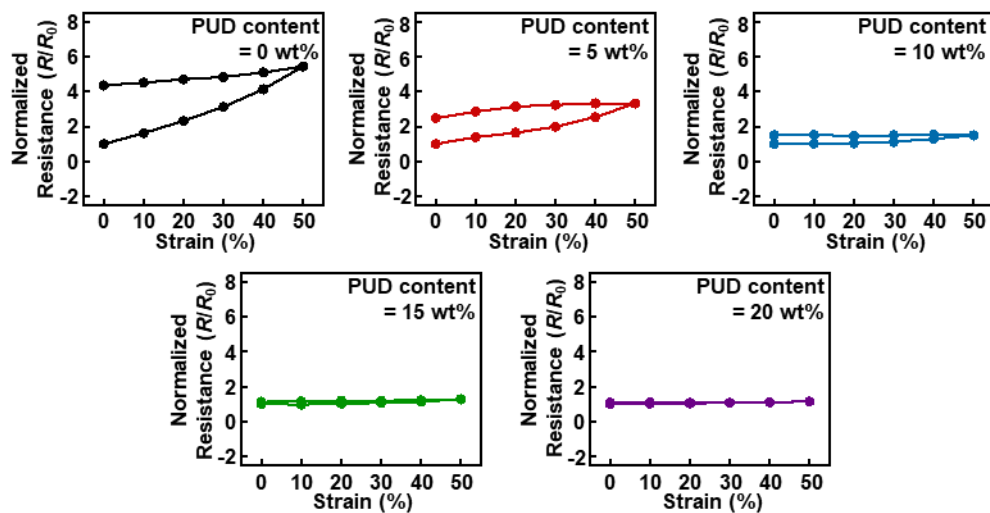

Fig. S9 Normalized resistance hysteresis of the PUD/PEDOT:PSS electrodes with different PUD content.

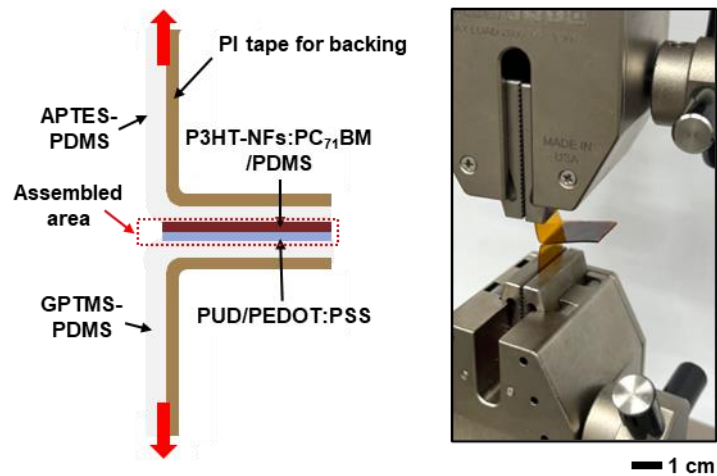

**Fig. S10** A schematic (left) and an optical image (right) of the t-peeling test between the light-sensing layers and the electrodes.

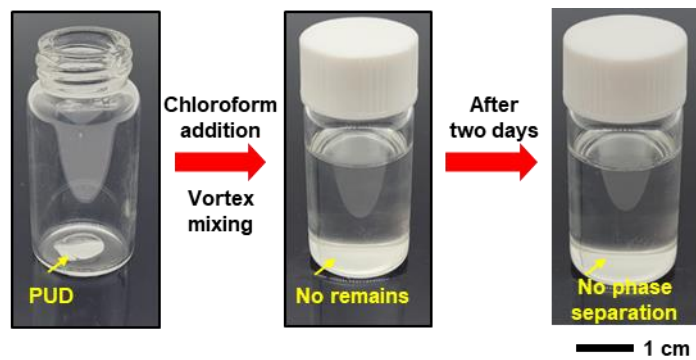

**Fig. S11 Optical images of the PUD dissolution in the chloroform.**



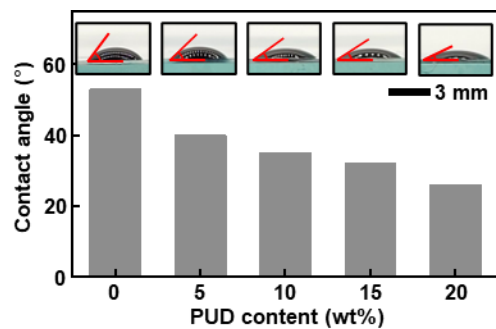

**Fig. S12 Contact angles of P3HT-NFs:PC<sub>71</sub>BM/PDMS solution on the PUD/PEDOT:PSS electrodes with different PUD content.**

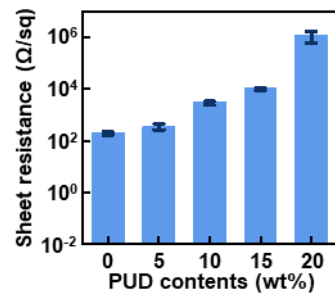

**Fig. S13** The sheet resistance of the PUD/PEDOT:PSS electrodes with different PUD content. ( $n = 5$ )

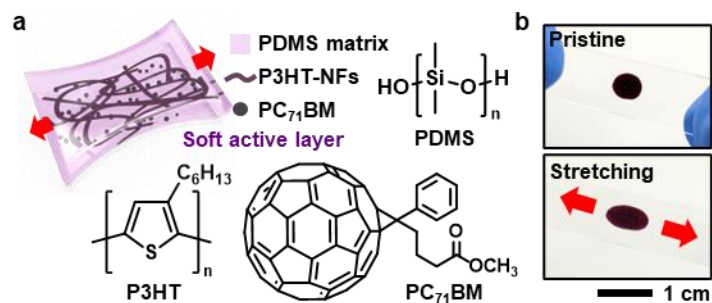

**Fig. S14 Soft light-sensing layer.** (a) A schematic of the soft light-sensing layer and composing molecules. (b) Optical images of the soft light-sensing layer under mechanical stretching.

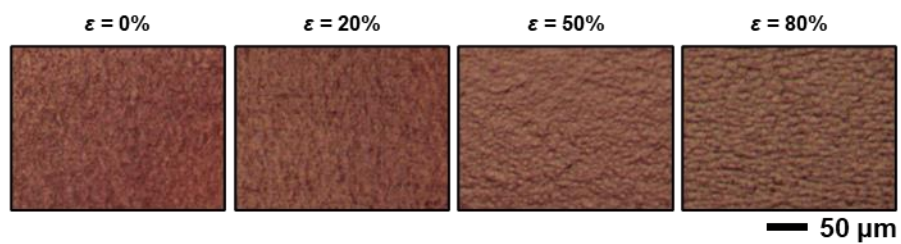

**Fig. S15** Optical microscopic images of the soft light-sensing layer under various mechanical strains ( $\epsilon$ ).

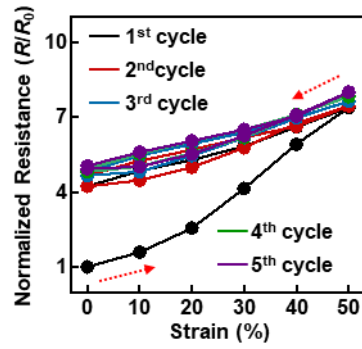

**Fig. S16 Normalized resistance hysteresis of the soft light-sensing layer during 5 cycles of cyclic stretching.**

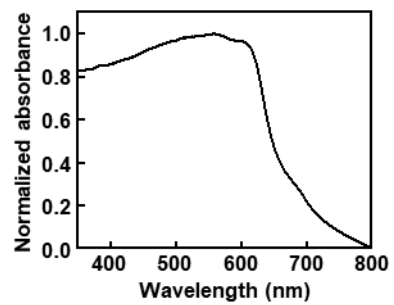

**Fig. S17** The UV-Vis absorption spectrum of the soft light-sensing layer.

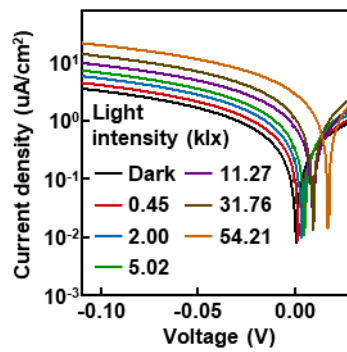

**Fig. S18** Current profiles of the all-soft v-OPDs in the dark and under various intensities of light illumination.

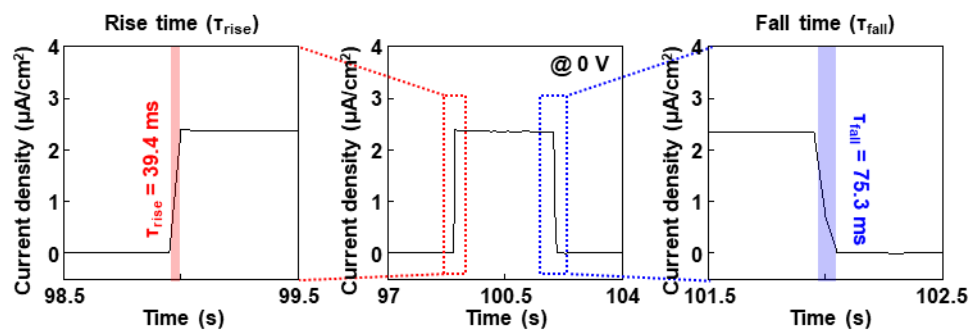

Fig. S19 The response time of the all-soft v-OPDs.



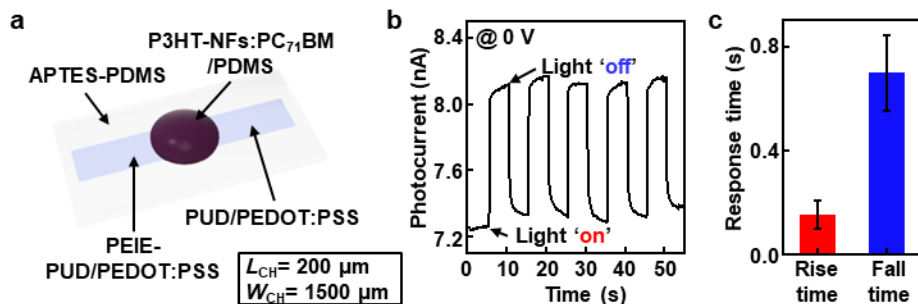

**Fig. S20 Device performance of the planar-type all-soft organic photodetector. (a)** A schematic of the planar-type all-soft organic photodetectors. **(b)** The dynamic photoresponse of the device during 5 light on/off cycles at 0 V (Intensity of the light: 52.85 klx). **(c)** The response time of the device ( $n = 5$ ).
